1  
2  
3  
4  
5  
6  
7  
8  
9  
10  
11  
12  
13  
14  
15  
16  
17  
18  
19  
20  
21  
22  
23  
24  
25  
26  
27  
28

**The effects of microcystin-LR in *Oryza sativa* root cells:  
F-actin as a new target of cyanobacterial toxicity**

D. Pappas, S. Gkelis, E. Panteris\*

Department of Botany, School of Biology, Aristotle University of Thessaloniki, 541 24  
Thessaloniki, Greece

\* Correspondence to: E. Panteris, e-mail: [epanter@bio.auth.gr](mailto:epanter@bio.auth.gr)

**Keywords:** Actin filaments; Cell cycle; Endoplasmic reticulum; Golgi apparatus;  
*Microcystis*; Rice

29 **ABSTRACT**

- 30 • Microcystins are toxins produced by cyanobacteria, notorious for negatively  
31 affecting a wide range of living organisms, among which several plant  
32 species. Although microtubules are a well-established target of microcystin  
33 toxicity, its effect on filamentous actin (F-actin) in plant cells has not been  
34 studied yet.
- 35 • The effects of microcystin-LR (MC-LR) and the extract of a microcystin-  
36 producing freshwater cyanobacterial strain (*Microcystis flos-aquae* TAU-MAC  
37 1510) on the cytoskeleton (F-actin and microtubules) of *Oryza sativa* (rice)  
38 root cells, were studied by light, confocal, and transmission electron  
39 microscopy. Considering the role of F-actin in endomembrane system  
40 distribution, the endoplasmic reticulum and the Golgi apparatus in extract-  
41 treated cells were also examined.
- 42 • F-actin in both MC-LR- and extract-treated meristematic and differentiating  
43 root cells exhibited time-dependent alterations, ranging from disorientation  
44 and bundling to the formation of ring-like structures, eventually resulting to a  
45 collapse of the F-actin network at longer treatments. Disorganization and  
46 eventual depolymerization of microtubules, as well as abnormal chromatin  
47 condensation were observed following treatment with the extract, effects  
48 which could be attributed to microcystins and other bioactive compounds.  
49 Moreover, cell cycle progression was inhibited in extract-treated roots,  
50 specifically affecting the mitotic events. As a consequence of F-actin network  
51 disorganization, endoplasmic reticulum elements appeared stacked and  
52 diminished, while Golgi dictyosomes appeared aggregated.
- 53 • These results support that F-actin is a prominent target of MC-LR, both in  
54 pure form and as an extract ingredient. Endomembrane system alterations

55 can also be attributed to the effects of cyanobacterial bioactive compounds  
56 (including microcystins) on F-actin cytoskeleton.

57

## 58 **INTRODUCTION**

59 Cyanobacteria are photosynthetic, oxygenic prokaryotes, inhabiting a variety of  
60 aquatic and terrestrial environments, surviving even extreme conditions (such as high  
61 temperature or salinity etc.; Codd et al., 2017). A wide range of species are known to  
62 produce cyanotoxins, a group of chemically diverse secondary metabolites (as  
63 reviewed by Pantelić et al., 2013), proven to be harmful to higher eukaryotes,  
64 including humans (Buratti et al., 2017) and various plant species (Máthé et al., 2013;  
65 Mitrovic et al., 2004). The most common cyanotoxins found in freshwater bodies are  
66 microcystins (MCs), water-soluble monocyclic heptapeptides, exhibiting two variable  
67 amino acids (Catherine et al., 2017). The toxicity of MCs is due to their ability to  
68 inhibit the activity of protein phosphatases 1 (PP1) and 2A (PP2A) (MacKintosh et al.,  
69 1990), which are involved in the cell cycle progression (Brautigam and Shenolikar,  
70 2018).

71 MCs are released into the surrounding water during cyanobacterial cell lysis (Sivonen  
72 and Jones, 1999), thus becoming eventually accessible to consumers either directly  
73 (through water supply) or indirectly, affecting crops (through irrigation water) destined  
74 for consumption. When present in irrigation water (due to naturally occurring  
75 cyanobacteria in freshwaters), MCs have been shown to bioaccumulate in cultivated  
76 plant species (Corbel et al., 2016; Drobac et al., 2017), raising serious concerns over  
77 food safety and the impacts on consumers' health (Cao et al., 2018a).

78 Rice (*Oryza sativa* L.) is a crop of great commercial value worldwide (FAO, 2018).  
79 Since its cultivation is closely related to the aquatic environment, it is prone to all the  
80 dangers imposed by the presence of cyanobacteria in the surrounding water.  
81 Although many studies have focused on the accumulation and toxicity of MCs in rice  
82 (Azevedo et al., 2014; Chen et al., 2012; Liang et al., 2016), their effects on the

83 physiology of rice cells remain unclear. A recent study has underlined the negative  
84 effects of MC-contaminated water on rice root growth (Cao et al., 2018b), as a result  
85 of mitotic disruption in dividing root cells.

86 Previous studies on plant cells have shown that MCs disrupt microtubule  
87 organization, leading to mitotic abnormalities, and induce chromatin  
88 hypercondensation, due to histone H3 hyperphosphorylation, while alterations in cell  
89 cycle progression have also been reported (for a review on the effects of MCs, see  
90 Máthé et al., 2013). Even though chromatin and microtubules are well-known  
91 “targets” of MCs in plant cells, the other component of the plant cytoskeleton, F-actin,  
92 has not been studied in MC-treated cells of any plant species so far. However, F-  
93 actin is important for plant growth, regulating the intracellular distribution of several  
94 organelles (Volkman and Baluška, 1999) and driving cytoplasmic streaming, a  
95 function pivotal for plant cell viability (Shimmen and Yokota, 2004). All reports about  
96 the adverse effects of MCs on plant cytoskeleton have been based on applying  
97 purified MCs (e.g. Garda et al., 2016; Máthé et al., 2013), as purified toxins offer high  
98 precision in determining the exact concentrations. On the other hand, crude extracts  
99 of MC-producing cyanobacterial strains, known to negatively affect plant growth, are  
100 helpful in simulating the natural exposure of plants to MCs during lab experiments  
101 (Pflugmacher et al., 2007; Prieto et al., 2011). In accordance, in the present study,  
102 the effects of both purified microcystin-LR (MC-LR) and a toxic cyanobacterial extract  
103 (containing MCs) on F-actin of rice root cells were investigated. In order to further  
104 highlight the significance of any disruption of F-actin due to the toxic extract,  
105 endoplasmic reticulum and Golgi apparatus distribution, related to F-actin (Boevink et  
106 al., 1998), as well as cytoplasmic streaming (Shimmen and Yokota, 2004; Volkman  
107 and Baluška, 1999) were examined.

108

## 109 **MATERIALS AND METHODS**

### 110 **Cyanobacterial strains, growth media and culture conditions**

111 A strain of the TAU-MAC culture collection (Gkelis and Panou, 2016), *Microcystis*  
112 *flos-aquae* TAU-MAC 1510, isolated from Lake Pamvotis, Greece (Gkelis et al.,  
113 2015a), was used for experimental purposes. *Microcystis flos-aquae* TAU-MAC 1510  
114 has been found to be toxic (Gkelis et al., 2015a), producing a range of microcystins,  
115 including MC-YR, MC-LR, [D-Asp<sup>3</sup>] MC-LR and MC-HiLR (Gkelis et al., 2019). The  
116 strain was cultured in BG-11 medium, containing NaNO<sub>3</sub> (Rippka, 1988), in a 500 mL  
117 glass Erlenmeyer flask (250 mL of medium were inoculated with a 4-5 mL inoculum,  
118 from an exponentially growing pre-culture, under aseptic conditions). The culture was  
119 grown at 24±1°C for about 30 days in a 12 h:12 h light:dark cycle at a photosynthetic  
120 photon flux density of 10 μmol m<sup>-2</sup> s<sup>-1</sup> using cool white fluorescent lamps.

121

#### 122 **Biomass collection and extraction**

123 The culture was centrifuged at 3,500 rpm for 10 min. The supernatant was discarded  
124 and the precipitate (biomass) was stored at -70°C overnight. Frozen biomass was  
125 lyophilized with an ALPHA 1-4 freeze dryer (Martin Christ, Gefriertrocknungsanlagen,  
126 Osterode am Harz, Germany), at temperature ranging from -48°C to -54°C and  
127 pressure between 0.05 and 0.02 mbar, until dry. Dry biomass was weighed (150 mg)  
128 and extracted thrice in 21 mL of 75% (v/v) methanol in glass tubes. The sample was  
129 sonicated during the first extraction step for 10 min with a Vibra-Cell VC-300 High  
130 Intensity Ultrasonic Processor (Sonics and Materials Inc., Newtown, CT, USA) and  
131 stirred for 45 min at each extraction step at room temperature. The extract was left to  
132 evaporate under aseptic conditions and the pellet was resuspended in 5 mL of  
133 double-distilled water. The aqueous extract was filtered through Whatman Polydisc  
134 TF filters (Whatman plc, Little Chalfont, UK) with a pore size of 0.2 μm.

135

#### 136 **Plant material and exposure to MC-LR and the crude extract**

137 Rice (*Oryza sativa* cv Axios, kindly provided by the National Cereal Institute,  
138 Thessaloniki, Greece) seeds were germinated on filter paper moistened with tap

139 water, in the dark, at 24±1°C. MC-LR purified from *Anabaena* strains (Halinen et al.,  
140 2007), generously provided by Prof. Kaarina Sivonen (Department of Microbiology,  
141 University of Helsinki), was used for treatments. Four- to five-day-old seedlings were  
142 placed with their roots submerged in either cyanobacterial aquatic extract or an  
143 aquatic solution of MC-LR inside Eppendorf tubes for various time periods (30 min, 1,  
144 2, 3 or 24 h) at the same conditions. Seedlings submerged in tubes with distilled  
145 water were used as control. The concentration of the MC-LR aquatic solution was set  
146 at 45 µg·mL<sup>-1</sup>, equal to the total concentration of microcystins contained in the  
147 *Microcystis flos-aquae* TAU-MAC 1510 strain (Gkelis et al., 2019), in order to achieve  
148 comparable results. Following exposure, root tips 2-3 mm long were cut with steel  
149 razor blades and prepared for fluorescence and transmission electron microscopy  
150 (TEM). All chemicals and reagents were purchased from Applichem (Darmstadt,  
151 Germany), Sigma-Aldrich (Taufkirchen, Germany) and Merck (Darmstadt, Germany)  
152 and all experimental procedures described below were performed at room  
153 temperature, unless otherwise stated.

154

### 155 **Endoplasmic reticulum and tubulin immunolabeling**

156 Endoplasmic reticulum and tubulin immunostaining were performed as mentioned by  
157 Adamakis et al. (2016), with some modifications. In particular, root tips were fixed in  
158 4% (w/v) paraformaldehyde (PFA) solution in PEM buffer (50 mM PIPES, 5mM  
159 EGTA, 5 mM MgSO<sub>4</sub>, pH 6.8) with the addition of 5% (v/v) dimethyl sulfoxide  
160 (DMSO) for 1 h. Fixed specimens were washed with PEM (3 x 10 min) and cell walls  
161 were digested with 2% (w/v) Macerozyme R-10 + 2% (w/v) cellulase Onozuka R-10  
162 (Duchefa Biochemie, Haarlem, Netherlands) solution in PEM for 1 h. After washing  
163 with PEM (3 x 10 min), the root tips were squashed on poly-L-lysine-coated  
164 coverslips, left to dry, and the cells were extracted with a 5% (v/v) DMSO + 1% (v/v)  
165 Triton X-100 solution in phosphate-buffered saline (PBS, pH 7.2) for 1 h. For  
166 endoplasmic reticulum immunolabeling, mouse anti-HDEL antibody (2E7, Santa Cruz

167 Biotechnology, Dallas, TX, USA), diluted 1:50 in PBS, and AlexaFluor488-anti-mouse  
168 (Invitrogen, Carlsbad, CA, USA), diluted 1:150 in PBS, were used. For tubulin  
169 immunolabeling, rat anti- $\alpha$ -tubulin (YOL 1/34, Serotec, Kidlington, UK) was applied as  
170 primary antibody and incubated overnight, then washed with PBS and incubated with  
171 FITC-anti-rat at 37°C for 3 h. Both antibodies were diluted 1:40 in PBS. DNA was  
172 counterstained with DAPI (0.9 mM stock solution of 4',6-diamidino-2-phenylindole in  
173 DMSO and further diluted 1:1000 in PBS) for 5 min. After final wash with PBS, all  
174 specimens were mounted with an anti-fade medium [PBS 1: 2 glycerol (v/v) + 0.5 %  
175 (w/v) p-phenylenediamine].

176

#### 177 **F-actin labeling with phalloidin**

178 F-actin labeling with fluorescent phalloidin was performed according to Stavropoulou  
179 et al. (2018). In short, F-actin in root tips was pre-stabilized in 300  $\mu$ M *m*-  
180 maleimidobenzoyl-*N*-hydroxysuccinimide ester in PEM, with the addition of 0.1%  
181 (v/v) Triton X-100 for 30 min in the dark. Immediately after pre-stabilization, fixation  
182 was performed with 4% (w/v) PFA in PEM + 5% (v/v) DMSO + 0.1% (v/v) Triton X-  
183 100, while DyLight 554-phalloidin (Cell Signaling Technology, Danvers, MA, USA)  
184 1:400 was also added in the fixative for better F-actin preservation. After washing  
185 with PEM (3 x 10 min), the specimens were extracted in 5% (v/v) DMSO + 1% (v/v)  
186 Triton X-100 in PBS for 1 h and F-actin labeling was performed by incubating with  
187 DyLight 554-phalloidin diluted 1:40 in PBS + 0.1% (v/v) Triton X-100 at 37°C for 2 h  
188 in the dark. After DNA counterstaining with DAPI (as mentioned above) and washing  
189 with PBS, all specimens were mounted with anti-fade medium.

190

#### 191 **Confocal fluorescence microscopy**

192 Fluorescent specimens were observed with a Zeiss Observer.Z1 (Carl Zeiss AG,  
193 Munich, Germany) microscope, equipped with the LSM780 confocal laser scanning

194 (CLSM) module, with the appropriate filters for each fluorophore. Imaging was  
195 achieved with ZEN2011 software according to the manufacturer's instructions.

196

### 197 **Fluorescence intensity measurements**

198 Fluorescence intensity measurements for F-actin were performed in maximum  
199 intensity projections of serial CLSM sections of root tips (in the meristematic and  
200 differentiation zone), treated with  $45 \mu\text{g}\cdot\text{mL}^{-1}$  MC-LR or the cyanobacterial extract for  
201 various time periods (30 min, 1, 2 or 24 h), using ImageJ (<https://imagej.net/Fiji>),  
202 according to Adamakis et al. (2014) and Mylona et al. (2020). The corrected total cell  
203 fluorescence (CTCF; Gavet and Pines, 2010) was calculated with the formula: CTCF  
204 = Integrated Density – (Area of selected cell X Mean fluorescence of background  
205 readings). Thirty individual cells from three different roots per treatment were  
206 measured for fluorescence intensity. Results were statistically analyzed (ANOVA with  
207 Dunnett's test) using SigmaPlot (San Jose, CA, USA), with significance at  $P < 0.001$ .

208

### 209 **Cell cycle analysis**

210 To assess the frequency of cells in various cell cycle stages, control and treated  
211 specimens prepared for F-actin labeling or tubulin immunostaining and DAPI staining  
212 were examined under a Zeiss Axiomager.Z2 light microscope equipped with  
213 epifluorescence or a Zeiss Observer.Z1 (Carl Zeiss AG, Munich, Germany)  
214 microscope with CLSM module. Cells at different cell cycle stages (interphase,  
215 preprophase/prophase, metaphase/anaphase and cytokinesis) were recognized  
216 according to F-actin/microtubule arrangement and/or chromatin state. At least 1000  
217 individual cells from three different roots per treatment (a minimum of 300  
218 meristematic cells per root) were counted. Statistical analysis of data (chi-squared  
219 test,  $df = 3$ ) was performed with SigmaPlot, with significance at  $P < 0.001$ .

220

### 221 **Live imaging of cytoplasmic streaming**



222 For cytoplasmic streaming recording, 4- to 5-day-old rice seedlings were placed on  
223 glass slides and their roots were dipped either in water (control) or in the extract,  
224 covered with a coverslip and observed with DIC optics under a Zeiss AxioImager.Z2  
225 light microscope (Carl Zeiss AG), equipped with an AxioCam MRc5 camera (Carl  
226 Zeiss AG). Time lapse images were captured using AxioVision Rel. 4.8.2 software  
227 (Carl Zeiss AG). Specifically, for each recording, 60 images captured every 2 sec,  
228 were combined in videos of 12 sec duration. The extract used for treatment was  
229 replenished regularly after each image capture.

230

### 231 **Transmission Electron Microscopy (TEM)**

232 Control and extract-treated (for 30 min or 1 h) root tips of 4- to 5-day-old rice  
233 seedlings were fixed in 3% (v/v) glutaraldehyde (PolySciences, Niles, IL, USA) in 50  
234 mM sodium cacodylate buffer (pH 7) for 4 h, washed and post-fixed with 1% (w/v)  
235 osmium tetroxide in the same buffer for 3 h at 4°C in the dark. Dehydration was  
236 performed in an acetone series, followed by treatment with propylene oxide (SERVA,  
237 Heidelberg, Germany) at 4°C and embedding in Spurr's resin (PolySciences, Niles,  
238 IL, USA). The embedded specimens were sectioned with a Reichert-Jung Ultracut E  
239 (Reichert-Jung Optical Company, Vienna, Austria) ultramicrotome. Ultrathin sections  
240 (70-90 nm) were collected on formvar-coated copper grids and double-stained in the  
241 dark with 2% (w/v) uranyl acetate in 70% (v/v) ethanol for 15 min and 1% (w/v) lead  
242 citrate for 10 min. The sections were examined with a JEOL JEM 1011 (JEOL Ltd.,  
243 Tokyo, Japan) TEM, equipped with a Gatan ES500W (Gatan Inc., Pleasanton, CA,  
244 USA) digital camera and images were acquired using Digital Micrograph 3.11.2  
245 software. CLSM and TEM images were processed with Adobe Photoshop CS4 with  
246 only linear settings.

247

## 248 **RESULTS**

### 249 **Effects on F-actin**

250 Fine actin filaments were abundant in all untreated meristematic cells (Fig. 1A1). F-  
251 actin phragmoplasts were obvious in cytokinetic cells, either control or treated with  
252 MC-LR for various times (arrows in Fig. 1). In MC-LR-treated cells, cortical actin  
253 filaments appeared disoriented (indicative arrowheads in Fig. 1B2) and bundled  
254 (indicative arrowheads in Figs 1C2, D2), from 30 min until 2 h of exposure, compared  
255 to the control (Fig. 1A2). Especially after 30 min and 1 h, ring-shaped F-actin  
256 conformations (typical examples in Fig. 1C4) could be observed in affected  
257 meristematic cells (arrowheads in Figs 1B3, C3, C5). However, after 24 h of  
258 treatment, F-actin intensity deteriorated significantly (Fig. 1E1) and cortical actin  
259 filaments were barely visible (Fig. 1E2).

260 Meristematic cells treated with the cyanobacterial extract (Fig. 2) also exhibited  
261 disoriented cortical actin filaments after 30 min of exposure (Fig. 2A2), as well as  
262 bundling effects (indicative arrowheads in Figs 2B1, B2, C1, C2) after 1 and 2 h. After  
263 24 h, apart from F-actin bundling (arrowhead in Fig. 2D2), several cells appeared  
264 totally devoid of actin filaments (star in Fig. 2D1).

265 In the differentiation zone, F-actin cables could be observed in untreated cells,  
266 exhibiting a predominant longitudinal orientation (Fig. 3A). After treatment with MC-  
267 LR, disorientation and bundling of F-actin was detectable (arrowheads in Figs 3B-E)  
268 between 30 min and 2 h of exposure, eventually leading to disappearance of F-actin  
269 in large areas of the tissue after 24 h (Fig. 3E).

270 In roots treated with the extract (Fig. 4), F-actin bundles were disoriented, an effect  
271 increasing in a time-dependent manner (arrows in Figs 4A, B, C1, D1). Furthermore,  
272 F-actin rings occurred in the affected cells after longer exposure (Figs 4C2, D2, D3).  
273 After 24 h, several cells were devoid of F-actin (Fig. 4D1).

274 CTCF measurements (Fig. 5) confirmed the hypothesis that fluorescence intensity  
275 gradually diminishes during the treatment with either MC-LR or the extract, in both  
276 meristematic and elongation zone the lowest levels being recorded after 24 h of  
277 treatment. This decrease appeared to be especially steep in MC-LR treated roots,

278 just after 30 min of treatment. Any temporary increases in fluorescence intensity (e.g.  
279 in differentiated root cells after 1 h of treatment with the extract) could be attributed to  
280 F-actin bundling effects.

281

## 282 **Effects on microtubules and chromatin**

283 Untreated meristematic root cells exhibited the typical microtubule arrays, i.e. cortical  
284 microtubules in interphase cells (Fig. S1A), the preprophase band and perinuclear  
285 microtubules in preprophase/prophase cells (Fig. S1B), the mitotic spindle in  
286 metaphase/anaphase cells (Fig. S1C) and the phragmoplast in telophase/cytokinetic  
287 cells (Fig. S1D).

288 Rice root cells treated with the toxic cyanobacterial extract for 30 min-24 h exhibited  
289 various time-dependent alterations in the organization of microtubules (Fig. S1E-K).

290 After 30 min of exposure, cortical microtubules of interphase cells were significantly  
291 fewer (Fig. S1E; *cf.* S1A). In affected preprophase cells, preprophase bands were  
292 visible, but perinuclear microtubules were absent (Fig. S1F; *cf.* S1B). In affected cells  
293 with condensed chromosomes, as assessed by DAPI staining, typical spindles were  
294 not found, as microtubules connected to the chromosomes appeared either  
295 abnormally elongated (Fig. S1G) or short and disoriented (Fig. S1H). In the above  
296 affected mitotic cells, microtubule fragments and/or fluorescent tubulin structures,  
297 apart from chromosome-connected microtubules, could also be observed (Figs S1G,  
298 H). In telophase/cytokinetic cells treated as above, phragmoplasts could be  
299 observed, the microtubules of which were longer than those of untreated cells (Fig.  
300 S1I; *cf.* S1D), their (-) ends sometimes attached on the surface of daughter nuclei.

301 After 1 h of treatment, microtubules were depolymerized (Figs S1J, K) in cells with  
302 normal-looking nucleus (Fig. S1J), as well as in cells with abnormal chromatin  
303 condensation (Fig. S1K). In some of these cells, fluorescent tubulin spots could be  
304 observed (Fig. S1J).

305 Interestingly, MC-LR-treated root cells exhibited control-like microtubule arrays.  
306 Occasionally, 30 min- and 1 h-treated interphase cells with typical cortical  
307 microtubules (Figs S2C, E; *cf.* S2A) exhibited endoplasmic microtubules, not typically  
308 observed in untreated cells (Figs S2D, F; *cf.* S2B), while in affected preprophase  
309 cells preprophase bands exhibited gaps (Fig S2G; *cf.* Fig. S2H). MC-LR-affected  
310 metaphase cells appeared to have typical mitotic spindles (Figs S2I, J; *cf.* Fig. S1C),  
311 while occasionally chromosomes out of the spindle could be observed (arrow in Fig.  
312 S2J).

313

#### 314 **Effects on cell cycle progression**

315 The assessment of cell cycle stages in treated root tip cells revealed that each stage  
316 frequency was significantly altered after 1 h of treatment with MC-LR, while it was  
317 severely disturbed in extract-treated roots even after 30 min (Table 1). In the latter  
318 case, the percentage of preprophase/prophase cells was increased after 30 min of  
319 treatment, as was the percentage of metaphase/anaphase cells after 1 h, compared  
320 to untreated roots. On the contrary, there was a notable decrease in the percentage  
321 of cytokinetic cells after 30 min and 1 h of treatment with the extract. Alterations  
322 observed (in both MC-LR- and extract-treated roots) were statistically significant (chi-  
323 squared test,  $df = 3$ ,  $P < 0.001$ )

324

#### 325 **Effects on cytoplasmic streaming**

326 Alterations of cytoplasmic streaming in affected root cells were visible after treatment  
327 with the extract (see Supplementary Videos). After 1 h, streaming either stopped or  
328 appeared to be slower (left and right arrow, respectively, Video S5; *cf.* S4), as  
329 opposed to that of root cells in presence of water, in which streaming remained vivid  
330 during the exposure time period (Videos S1-3). After 2 h, streaming (where present)  
331 was noticeably abnormal and cytoplasmic aggregates could be observed (arrow and  
332 arrowhead, respectively, Video S6; *cf.* S4).

333

### 334 **Effects on the endoplasmic reticulum and Golgi apparatus**

335 The toxic extract also affected the integrity and distribution of the endoplasmic  
336 reticulum. In cells exposed to the extract for 30 min and 1 h, fluorescent endoplasmic  
337 reticulum aggregates were observed by CLSM, located cortically and/or around the  
338 nucleus (Fig. 6B, C), in contrast to the evenly distributed endoplasmic reticulum of  
339 untreated cells (Fig. 6A). After 3 h of treatment, these aggregates appeared to fade,  
340 while the nucleus exhibited morphological alteration (Fig. 6D).

341 TEM observations of root cells treated with the extract for 30 min revealed that  
342 endoplasmic reticulum cisternae were heavily stacked (Fig. 6F), in contrast to the  
343 loosely packed cisternae of untreated cells (Fig. 6E). In addition, while in untreated  
344 cells Golgi dictyosomes were evenly distributed (Fig. 7A), in cells affected by the  
345 extract the dictyosomes appeared clustered, even after 30 min of treatment with  
346 vesicles trapped among them (Fig. 7B). After 1 h of exposure, Golgi apparatus  
347 clustering and vesicle aggregation were intensified (Fig. 7C).

348

### 349 **DISCUSSION**

350 In this study, MC-LR disrupted F-actin in rice roots. The detrimental effects were  
351 recorded as significant alterations of the network (Figs 1, 3) and as a gradual  
352 decrease in F-actin fluorescence intensity (Fig. 5), eventually leading to a collapse in  
353 both meristematic and differentiating root cells (Figs 1, 3).

354 Apart from the above similarity, there was a significant difference between the  
355 treatment with purified MC-LR and the extract. Exposure to the latter induced severe  
356 disruption of microtubule arrays and alterations of the frequency of cells at various  
357 cell cycle stages after just 30 min (Table 1). On the contrary, MC-LR affected  
358 microtubule organization only slightly, as well as cell cycle distribution only after 1 h  
359 of exposure.

360 According to cytological studies on other plant species, MCs affect the integrity and  
361 organization of microtubules, causing chromatin hypercondensation in plant cells by  
362 inhibiting PP1 and PP2A, which subsequently leads to histone H3  
363 hyperphosphorylation (Beyer et al., 2012; Máthé et al., 2009; Ujvárosi et al., 2019).  
364 Also, experiments on *Arabidopsis thaliana* indicated the involvement of subfamily II  
365 and TON2 subunits of the PP2A holoenzyme in cortical microtubule organization  
366 and, probably, in microtubule nucleation through interaction with  $\gamma$ TuRCs (Yoon et  
367 al., 2018). Studies on PP2A have highlighted its importance for plant cytoskeleton  
368 organization (especially microtubules), affecting preprophase band formation,  
369 division plane determination (Spinner et al., 2013), and cell shape (Kirik et al., 2012).  
370 Interestingly, in the present study, treatment with purified MC-LR did not result in any  
371 of these effects. A possible reason for this could be that the duration of treatments  
372 here was far shorter than in the previously mentioned studies. In most of the relevant  
373 studies, exposure to MC-LR spanned from 4 h to 20 days (Beyer et al., 2012; Garda  
374 et al., 2016; Mathé et al., 2009). However, in the present study microtubules were  
375 severely affected only after treatment with the crude toxic extract for a very short time  
376 (30 min and 1 h), which indicates the possible involvement of other compounds in the  
377 effect mechanism. Except of microcystins, which have been detected in *Microcystis*  
378 *flos-aquae* TAU-MAC 1510, it is also likely that these effects may be the result of a  
379 synergistic action of various bioactive compounds produced by the strain. For  
380 example, anabaenopeptins, which show activity against PP1 (Gkelis et al., 2006), are  
381 known to occur in large concentrations in *Microcystis*-dominated blooms (Gkelis et  
382 al., 2015b) or microginins, which have been recently reported to be abundant in  
383 blooms of Greek freshwater cyanobacteria (Zervou et al., 2020), are also known to  
384 be bioactive (Ujvárosi et al., 2020; for a review on the variety of cyanobacterial  
385 bioactive compounds, see Dittmann et al., 2015; Elisabeth & Janssen, 2019).  
386 The findings of the present study prove that F-actin is indeed a target of  
387 cyanobacterial toxicity, specifically of microcystins, in plant cells. To date, information

388 about the way actin filaments are affected by microcystins derives exclusively from  
389 studies on treated animal cells. In rat hepatocytes and fibroblasts, all three  
390 cytoskeletal components (microtubules, intermediate filaments and microfilaments)  
391 are sensitive to MC-LR treatments in a dose- and time-dependent manner  
392 (Wickstrom et al., 1995). Disorganization of intermediate filaments and microtubules  
393 was reported to precede alterations in normal disposition of microfilaments in animal  
394 cells. These alterations included extensive reorganization of F-actin into “rosette-like  
395 structures”, which eventually collapsed, forming aggregates around the cell nucleus  
396 (Wickstrom et al. 1995). Similar observations concerning F-actin were also made in  
397 rat hepatocytes by Ghosh et al. (1995) and by Batista et al. (2003) in primary human  
398 hepatocytes, while Gácsi et al. (2009) reported the formation of circular actin  
399 aggregations around the nuclei of MC-LR-treated Chinese hamster ovary (CHO-K1)  
400 cells after 24 h of incubation at high concentrations of the cyanotoxin (20  $\mu$ M). In  
401 particular, actin aggregation at the cell periphery seems to be a common alteration in  
402 microcystin-treated animal cells (Eriksson et al., 1989; Falconer and Yeung, 1992;  
403 Runnegar and Falconer, 1986; Wickstrom et al., 1995), at least for some time during  
404 the cascade of F-actin-collapse events. As expected, alterations in F-actin  
405 organization consequently led to animal cell shape deformation.

406 It could be suggested that F-actin disruption in rice root cells is attributed to protein  
407 phosphatase inhibition. In human T lymphocytes, inhibition of PP1 and PP2A has  
408 been shown to block dephosphorylation of actin depolymerizing factor (ADF)/cofilin,  
409 an actin-binding protein, which is responsible for actin depolymerization when in  
410 active, unphosphorylated state (Ambach et al., 2000). Such an effect on PP1 and  
411 PP2A could explain the bundling effects observed in the F-actin network of rice root  
412 cells affected by microcystin, as F-actin tends to become stabilized. In a more recent  
413 study (Wang et al., 2014), MC-LR was found to directly bind to PP2A in SMMC-7721  
414 human liver cancer cells, inhibiting enzyme activity and causing cytoskeletal  
415 rearrangements. More specifically, PP2A inhibition led to hyperphosphorylation of

416 various cytoskeleton-associated proteins (including cofilins) and inactivation (as well  
417 as changes in subcellular localization) of Rac1, a small GTPase, which is regulated  
418 by PP2A (Nunbhakdi-Craig et al., 2003) and is involved in microtubule and actin  
419 dynamics (Wittmann et al., 2003). In plants, the presence of cofilins has been  
420 reported in various species (Hussey et al., 2002), while PP2A-2, an isoform of PP2A,  
421 is known to directly regulate ADF/cofilin (and, therefore, F-actin rearrangements) in  
422 *Arabidopsis thaliana* (Wen et al., 2012). In addition, OsRac1 (a rice homolog of  
423 Rac1), along with its activator GEF protein OsSPK1, have been recently suggested  
424 to be regulators of actin dynamics in rice (Wang et al., 2018).

425 Importantly, in rice root cells, progression of F-actin disorganization/disorientation  
426 appeared to be slower than in animal cells and not as harsh; in fact, even after 24 h  
427 of exposure, actin filaments could still be observed, though scarce. The increased  
428 resistance of actin filaments to microcystins could be attributed to at least three  
429 reasons: (1) Most of the actin filaments, especially in vacuolated cells, are  
430 interconnected in thick bundles, which could offer stabilization against adverse  
431 factors. (2) Cortical actin filaments are interconnected to cellulose microfibrils of the  
432 cell wall by formin1 (Martinière et al., 2011), also regulating F-actin stability and cell  
433 shape (Rosero et al. 2013, 2016). (3) F-actin may appear more stabilized following  
434 inactivation of ADF/cofilin, due to inhibition of protein phosphatases by microcystins.

435 Whichever the mechanism by which F-actin is affected by microcystins, the effect of  
436 a microcystin-rich crude extract indicates that this could occur in environmental  
437 conditions, due to cell lysis during cyanobacterial blooms. According to this view,  
438 disruption of F-actin may be one more possible reason for cyanobacterial toxicity to  
439 plants, apart from the already established effects on microtubules and the cell cycle.

440 In addition, the importance of F-actin disorganization is also reflected on the  
441 alterations observed in endoplasmic reticulum and the Golgi apparatus. As reviewed  
442 by Volkmann and Baluška (1999), movement and distribution of endoplasmic  
443 reticulum and the Golgi apparatus in plant cells are controlled by the F-actin network.



444 Furthermore, cytoplasmic streaming was disturbed (see Supplementary Videos), due  
445 to its dependence on actomyosin integrity and function (for a review, see Shimmen  
446 and Yokota, 2004). Consequently, stacking of endoplasmic reticulum as well as  
447 abnormal aggregation of Golgi dictyosomes could be a direct result of defective F-  
448 actin organization and subsequent intracellular motility defects. Apart from the  
449 involvement of F-actin, alterations of endoplasmic reticulum have been reported in  
450 both plant (Huang et al., 2009) and animal cells, either fish (Li et al., 2001) or  
451 mammalian (Alverca et al., 2009), and attributed to microcystins, after treatment for  
452 various time periods, ranging from hours to days. These results, therefore, suggest  
453 the presence of a mechanism of toxicity, which involves microcystins and affects a  
454 variety of cell systems. Nevertheless, in the present study, endoplasmic reticulum  
455 cisternae seemed to diminish after 1 h of exposure. Interestingly, absence of smooth  
456 endoplasmic reticulum has been also previously observed in rat hepatocytes after  
457 treatment with MC-LR for 20 min (Eriksson et al., 1989).

458 In conclusion, F-actin is a target of MC-LR. In addition, the microcystin-rich extract of  
459 the cyanobacterial strain *Microcystis flos-aquae* TAU-MAC 1510 disrupts cytoskeletal  
460 components, F-actin and microtubules, as well as the endomembrane system and  
461 cell cycle distribution, in root tip cells of *Oryza sativa*. Microcystins present in the  
462 extract could be held responsible for certain of the effects observed, as they have  
463 previously been linked with defects in chromatin condensation, but most probably a  
464 synergistic action of microcystins with other cyanobacterial bioactive compounds may  
465 be hypothesized. To our best knowledge, this is the first report of a microcystin (MC-  
466 LR) affecting the plant F-actin cytoskeleton and the first attempt to feature the potent  
467 effects of cyanobacterial bioactive compounds on F-actin-related cell functions.  
468 Further research is needed in order to elucidate the above in detail.

469

470 **ACKNOWLEDGEMENTS**

471 This research is part of a PhD thesis (Dimitris Pappas) and is co-financed by Greece  
472 and the European Union (European Social Fund- ESF) through the Operational  
473 Programme «Human Resources Development, Education and Lifelong Learning» in  
474 the context of the project “Strengthening Human Resources Research Potential via  
475 Doctorate Research” (MIS-5000432), implemented by the State Scholarships  
476 Foundation (IKY). Emmanuel Panteris is supported by the AUPh Research  
477 Committee (Grant No 91913). The authors would like to deeply thank Prof. Kaarina  
478 Sivonen (University of Helsinki, Finland) for generously providing a stock of MC-LR,  
479 as well as Assist. Prof. Ioannis-Dimosthenis Adamakis (National and Kapodistrian  
480 University of Athens, Greece) and Assoc. Prof. George Komis (Palacký University  
481 Olomouc, Czechia) for their advice and critical reading of the manuscript.

482

#### 483 REFERENCES

- 484 Adamakis I.-D.S., Panteris E., Eleftheriou E.P. (2014) The nitrate reductase inhibitor,  
485 tungsten, disrupts actin microfilaments in *Zea mays* L. *Protoplasma*, **251**, 567-574.
- 486 Adamakis I.-D.S., Panteris E., Eleftheriou E.P. (2016) Bisphenol A disrupts  
487 microtubules and induces multipolar spindles in dividing root tip cells of the  
488 gymnosperm *Abies cephalonica*. *Chemosphere*, **149**, 202-210.
- 489 Alverca E., Andrade M., Dias E., Sam Bento F., Batoréu M.C.C., Jordan P., Silva  
490 M.J., Pereira P. (2009) Morphological and ultrastructural effects of microcystin-LR  
491 from *Microcystis aeruginosa* extract on a kidney cell line. *Toxicol*, **54**, 283-294.
- 492 Ambach A., Saunus J., Konstandin M., Wesselborg S., Meuer S.C., Samstag Y.  
493 (2000) The serine phosphatases PP1 and PP2A associate with and activate the  
494 actin-binding protein cofilin in human T lymphocytes. *European Journal of*  
495 *Immunology*, **30**, 3422-3431.

- 496 Azevedo C.C., Azevedo J., Osório H., Vasconcelos V., Campos A. (2014) Early  
497 physiological and biochemical responses of rice seedlings to low concentration of  
498 microcystin-LR. *Ecotoxicology*, **23**, 107-121.
- 499 Batista T., de Sousa G., Šuput J.S., Rahmani R., Šuput D. (2003) Microcystin-LR  
500 causes the collapse of actin filaments in primary human hepatocytes. *Aquatic*  
501 *Toxicology*, **65**, 85-91.
- 502 Beyer D., Tándor I., Kónya Z., Bátori R., Roszik J., Vereb G., Erdődi F., Vasas G., M-  
503 Hamvas M., Jambrovics K., Máthé C. (2012) Microcystin-LR, a protein  
504 phosphatase inhibitor, induces alterations in mitotic chromatin and microtubule  
505 organization leading to the formation of micronuclei in *Vicia faba*. *Annals of*  
506 *Botany*, **110**, 797-808.
- 507 Boevink P., Oparka K., Santa Cruz S., Martin B., Betteridge A., Hawes C. (1998)  
508 Stacks on tracks: the plant Golgi apparatus traffics on an actin/ER network. *Plant*  
509 *Journal*, **15**, 441-447.
- 510 Brautigam D.L., Shenolikar S. (2018) Protein serine/threonine phosphatases: Keys to  
511 unlocking regulators and substrates. *Annual Review of Biochemistry*, **87**, 921-964.
- 512 Buratti M.F., Manganelli M., Vichi S., Stefanelli M., Scardala S., Testai E., Funari E.  
513 (2017) Cyanotoxins: producing organisms, occurrence, toxicity, mechanism of  
514 action and human health toxicological risk evaluation. *Archives of Toxicology*, **91**,  
515 1049-1130.
- 516 Cao Q., Rediske R.R., Yao L., Xie L. (2018a) Effect of microcystins on root growth,  
517 oxidative response, and exudation of rice (*Oryza sativa*). *Ecotoxicology and*  
518 *Environmental Safety*, **149**, 143-149.
- 519 Cao Q., Steinman A.D., Wan X., Xie L. (2018b) Bioaccumulation of microcystin  
520 congeners in soil-plant system and human health risk assessment: A field study  
521 from Lake Taihu region of China. *Environmental Pollution*, **240**, 44-50.
- 522 Catherine A., Bernard C., Spoof L., Bruno M. (2017) Microcystins and Nodularins. In:  
523 Meriluoto, J., Spoof, L., Codd, G.A. (Eds.), Handbook of Cyanobacterial

- 524 Monitoring and Cyanotoxin Analysis. John Wiley and Sons, Ltd., Chichester, UK:  
525 109-126.
- 526 Chen J., Han F.X., Wang F., Zhang H., Zhiqi S. (2012) Accumulation and  
527 phytotoxicity of microcystin-LR in rice (*Oryza sativa*). *Ecotoxicology and*  
528 *Environmental Safety*, **76**, 193-199.
- 529 Codd G.A., Meriluoto J., Metcalf J.S. (2017) Introduction: Cyanobacteria,  
530 Cyanotoxins, Their Human Impact, and Risk Management. In: Meriluoto, J.,  
531 Spoof, L., Codd, G.A. (Eds.), *Handbook of Cyanobacterial Monitoring and*  
532 *Cyanotoxin Analysis*. John Wiley and Sons, Ltd., Chichester, UK: 3-8.
- 533 Corbel S., Mouglin C., Nélieu S., Delarue G., Bouaïcha N. (2016) Evaluation of the  
534 transfer and the accumulation of microcystins in tomato (*Solanum lycopersicum*  
535 cultivar MicroTom) tissues using a cyanobacterial extract containing microcystins  
536 and the radiolabeled microcystin-LR (<sup>14</sup>C-MC-LR). *Science of the Total*  
537 *Environment*, **541**, 1052-1058.
- 538 Dittmann E., Gugger M., Sivonen K., Fewer D.P. (2015) Natural product biosynthetic  
539 diversity and comparative genomics of the cyanobacteria. *Trends in Microbiology*,  
540 **23**, 642-652.
- 541 Drobac D., Tokodi N., Kiproviski B., Malenčić D., Važić T., Nybom S., Meriluoto J.,  
542 Svirčev Z. (2017) Microcystin accumulation and potential effects on antioxidant  
543 capacity of leaves and fruits of *Capsicum annum*. *Journal of Toxicology and*  
544 *Environmental Health, Part A*, **80**, 145-154.
- 545 Elisabeth M., Janssen L. (2019) Cyanobacterial peptides beyond microcystins – A  
546 review on co-occurrence, toxicity, and challenges for risk assessment. *Water*  
547 *Research*, **151**, 488-499.
- 548 Eriksson J.E., Paatero G.I.L., Meriluoto J.A.O., Codd G.A., Kass G.E.N., Nicotera P.,  
549 Orrenius S. (1989) Rapid microfilament reorganization induced in isolates rat  
550 hepatocytes by microcystin-LR, a cyclic peptide toxin. *Experimental Cell*  
551 *Research*, **185**, 86-100.

- 552 Falconer I.R., Yeung D.S.K. (1992) Cytoskeletal changes in hepatocytes induced by  
553 *Microcystis* toxins and their relation to hyperphosphorylation of cell proteins.  
554 *Chemico-Biological Interactions*, **81**, 181-196.
- 555 FAO Rice Market Monitor (2018) Volume XXI, Issue No. 1.
- 556 Gácsi M., Antal O., Vasas G., Máthé C., Borbély G., Saker M.L., Győri J., Farkas A.,  
557 Vehovszky Á., Bánfalvi G. (2009) Comparative study of cyanotoxins affecting  
558 cytoskeletal and chromatin structures in CHO-K1 cells. *Toxicology in Vitro*, **23**,  
559 710-718.
- 560 Garda T., Kónya Z., Tándor I., Beyer D., Vasas G., Erdódi F., Vereb G., Papp G.,  
561 Riba M., M-Hamvas M., Máthé C. (2016) Microcystin-LR induces mitotic spindle  
562 assembly disorders in *Vicia faba* by protein phosphatase inhibition and not  
563 reactive oxygen species induction. *Journal of Plant Physiology*, **199**, 1-11.
- 564 Gavet O., Pines J. (2010) Activation of cyclin B1-Cdk1 synchronizes events in the  
565 nucleus and the cytoplasm at mitosis. *Journal of Cell Biology*, **189**, 247-259.
- 566 Ghosh S., Khan S.A., Wickstrom M., Beasley V. (1995) Effects of microcystin-LR on  
567 actin and the actin-associated proteins  $\alpha$ -actinin and talin in hepatocytes. *Natural*  
568 *Toxins*, **3**, 405-414.
- 569 Gkelis S., Lanaras T., Sivonen K. (2006) The presence of microcystins and other  
570 cyanobacterial bioactive peptides in aquatic fauna collected from Greek lakes.  
571 *Aquatic Toxicology*, **78**, 32-41.
- 572 Gkelis S., Lanaras T., Sivonen K. (2015b) Cyanobacterial toxic and bioactive  
573 peptides in freshwater bodies of Greece: concentrations, occurrence patterns and  
574 implications for human health. *Marine Drugs*, **13**, 6319-6335.
- 575 Gkelis S., Panou M. (2016) Capturing biodiversity: linking a cyanobacteria culture  
576 collection to the “scratchpads” virtual research environment enhances biodiversity  
577 knowledge. *Biodiversity Data Journal*, **4**: e7965.
- 578 Gkelis S., Panou M., Konstantinou D., Apostolidis P., Kasampali A., Papadimitriou S.,  
579 Kati D., Di Lorenzo G.M., Ioakeim S., Zervou S.-K., Christophoridis C., Triantis

- 580 T.M., Kaloudis T., Hiskia A., Arsenakis M. (2019) Diversity, cyanotoxin production,  
581 and bioactivities of cyanobacteria isolated from freshwaters of Greece. *Toxins*, **11**,  
582 436.
- 583 Gkelis S., Tussy P.F., Zaoutsos N. (2015a) Isolation and preliminary characterization  
584 of cyanobacteria strains from freshwaters of Greece. *Open Life Sciences*, **10**, 52-  
585 60.
- 586 Haalinen K., Jokela, J., Fewer D.P., Wahlsten M., Sivonen K. (2007) Direct evidence  
587 for production of microcystins by *Anabaena* strains from the Baltic Sea. *Applied*  
588 *and Environmental Microbiology*, **73**, 6543-6550.
- 589 Huang W., Xing W., Li D., Liu Y. (2009) Morphological and ultrastructural changes in  
590 tobacco BY-2 cells exposed to microcystin-RR. *Chemosphere*, **76**, 1006-1012.
- 591 Hussey P.J., Allwood E.G., Smertenko A.P. (2002) Actin-binding proteins in the  
592 *Arabidopsis* genome database: properties of functionally distinct plant actin-  
593 depolymerizing factors/cofilins. *Philosophical Transactions of the Royal Society B*,  
594 **357**, 791-798.
- 595 Kirik A., Ehrhardt D.W., Kirik V. (2012) *TONNEAU2/FASS* regulates the geometry of  
596 microtubule nucleation and cortical array organization in interphase *Arabidopsis*  
597 cells. *Plant Cell*, **24**, 1158-1170.
- 598 Li X., Liu Y., Song L. (2001) Cytological alterations in isolated hepatocytes from  
599 common carp (*Cyprinus carpio* L.) exposed to microcystin-LR. *Environmental*  
600 *Toxicology*, **16**, 517-522.
- 601 Liang C., Wang W., Wang Y. (2016) Effect of irrigation with microcystins-  
602 contaminated water on growth, yield and grain quality of rice (*Oryza sativa*).  
603 *Environmental Earth Sciences*, **75**, 505-514.
- 604 MacKintosh C., Beattie K.A., Klumpp S., Cohen P., Codd G.A. (1990) Cyanobacterial  
605 microcystin-LR is a potent and specific inhibitor of protein phosphatases 1 and 2A  
606 from both mammals and higher plants. *FEBS Letters*, **264**, 187-192.

- 607 Martinière A., Gayral P., Hawes C., Runions J. (2011) Buliding bridges: formin1 of  
608 Arabidopsis forms a connection between the cell wall and the actin cytoskeleton.  
609 *Plant Journal*, **66**, 354-365.
- 610 Máthé C., Beyer D., Erdódi F., Serfőző Z., Székvölgyi L., Vasas G., M-Hamvas M.,  
611 Jámbrik K., Gonda S., Kiss A., Szigeti Z.M., Surányi G. (2009) Microcystin-LR  
612 induces abnormal root development by altering microtubule organization in tissue-  
613 cultured common reed (*Phragmites australis*) plantlets. *Aquatic Toxicology*, **92**,  
614 122-130.
- 615 Máthé C., M-Hamvas M., Vasas G. (2013) Microcystin-LR and cylindrospermopsin  
616 induced alterations in chromatin organization of plant cells. *Marine Drugs*, **11**,  
617 3689-3717.
- 618 Mitrovic S.M., Pflugmacher S., James K.J., Furey A. (2004) Anatoxin-a elicits an  
619 increase in peroxidase and glutathione S-transferase activity in aquatic plants.  
620 *Aquatic Toxicology*, **68**, 185-192.
- 621 Mylona Z., Panteris E., Kevrekidis T., Malea P. (2020) Silver nanoparticle toxicity  
622 effect on the seagrass *Halophila stipulacea*. *Ecotoxicology and Environmental*  
623 *Safety*, **189**, 109925.
- 624 Nunbhakdi-Craig V., Craig L., Machleidt T., Sontag E. (2003) Simian virus 40 small  
625 tumor antigen induces deregulation of the actin cytoskeleton and tight junctions in  
626 kidney epithelial cells. *Journal of Virology*, **77**, 2807-2818.
- 627 Pantelić D., Svirčev Z., Simeunović J., Vidović M., Trajković I. (2013) Cyanotoxins:  
628 Characteristics, production and degradation routes in drinking water treatment  
629 with reference to the situation in Serbia. *Chemosphere*, **91**, 421-441.
- 630 Pflugmacher S., Aulhorn M., Grimm B. (2007) Influence of a cyanobacterial crude  
631 extract containing microcystin-LR on the physiology and antioxidative defence  
632 systems of different spinach variants. *New Phytologist*, **175**, 482-489.
- 633 Prieto A., Campos A., Cameán A., Vasconcelos V. (2011) Effects on growth and  
634 oxidative stress status of rice plants (*Oryza sativa*) exposed to two extracts of

- 635 toxin-producing cyanobacteria (*Aphanizomenon ovalisporum* and *Microcystis*  
636 *aeruginosa*). *Ecotoxicology and Environmental Safety*, **74**, 1973-1980.
- 637 Rippka R. (1988) Isolation and purification of cyanobacteria. *Methods in Enzymology*,  
638 **167**, 3-27.
- 639 Rosero A., Oulehlová D., Stillerová L., Schiebertová P., Grunt M., Žárský V.,  
640 Cvrčková F. (2016) Arabidopsis FH1 formin affects cotyledon pavement cell shape  
641 by modulating cytoskeleton dynamics. *Plant Cell Physiology*, **57**, 488–504.
- 642 Rosero A., Žárský V., Cvrčková F. (2013) AtFH1 formin mutation affects actin  
643 filament and microtubule dynamics in *Arabidopsis thaliana*. *Journal of*  
644 *Experimental Botany*, **64**, 585–597.
- 645 Runnegar M.T.C., Falconer I.R. (1986) Effect of toxin from the cyanobacterium  
646 *Microcystis aeruginosa* on ultrastructural morphology and actin polymerization in  
647 isolated hepatocytes. *Toxicon*, **24**, 109-115.
- 648 Shimmen T., Yokota E. (2004) Cytoplasmic streaming in plants. *Current Opinion in*  
649 *Cell Biology*, **16**, 68-72.
- 650 Sivonen K., Jones G. (1999) Cyanobacterial Toxins. In: Chorus, I., Bartram, J. (Eds.),  
651 Toxic Cyanobacteria in Water: A Guide to their Public Health Consequences,  
652 Monitoring and Management. E and FN Spon, London: 41-111.
- 653 Spinner L., Gadeyne A., Belcram K., Goussot M., Moison M., Duroc Y., Eeckhout D.,  
654 De Winne N., Schaefer E., Van De Slijke E., Persiau G., Witters E., Gevaert K.,  
655 De Jaeger G., Bouchez D., Van Damme D., Pastuglia M. (2013) A protein  
656 phosphatase 2A complex spatially controls plant cell division. *Nature*  
657 *Communications*, **4**, 1863.
- 658 Stavropoulou K., Adamakis I.-D.S., Panteris E., Arseni E.-M., Eleftheriou E.P. (2018)  
659 Disruption of actin filaments in *Zea mays* by bisphenol A depends on their  
660 crosstalk with microtubules. *Chemosphere*, **195**, 653-665.



- 661 Ujvárosi A.Z., Hercog K., Riba M., Gonda S., Filipič M., Vasas G., Žegura B. (2020)  
662 The cyanobacterial oligopeptides microginins induce DNA damage in the human  
663 hepatocellular carcinoma (HepG2) cell line. *Chemosphere*, **240**, 124880.
- 664 Ujvárosi A.Z., Riba M., Garda T., Gyémánt G., Vereb G., M-Hamvas M., Vasas G.,  
665 Máthé C. (2019) Attack of *Microcystis aeruginosa* bloom on a *Ceratophyllum*  
666 *submersum* field: Ecotoxicological measurements in real environment with real  
667 microcystins exposure. *Science of the Total Environment*, **662**, 735-745.
- 668 Volkmann D., Baluška F. (1999) Actin cytoskeleton in plants: From transport  
669 networks to signaling networks. *Microscopy Research and Technique*, **47**, 135-  
670 154.
- 671 Wang H., Liu J., Lin S., Wang B., Xing M., Guo Z., Xu L. (2014) MCLR-induced PP2A  
672 inhibition and subsequent Rac1 inactivation and hyperphosphorylation of  
673 cytoskeleton-associated proteins are involved in cytoskeleton rearrangement in  
674 SMMC-7721 human liver cancer cell line. *Chemosphere*, **112**, 141-153.
- 675 Wang Q., Li Y., Ishikawa K.I., Kosami K., Uno K., Nagawa S., Tan L., Du J.,  
676 Shimamoto K., Kawano Y. (2018) Resistance protein Pit interacts with the GEF  
677 OsSPK1 to activate OsRac1 and trigger rice immunity. *Proceedings of the*  
678 *National Academy of Sciences of the United States of America*, **115**, 1551-1560.
- 679 Wen F., Wang J., Xing D. (2012) A protein phosphatase 2A catalytic subunit  
680 modulates blue light-induced chloroplast avoidance movements through regulating  
681 actin cytoskeleton in Arabidopsis. *Plant Cell Physiology*, **53**, 1366-1379.
- 682 Wickstrom M.L., Khan S.A., Haschek W.M., Wyman J.F., Eriksson J.E., Schaeffer  
683 D.J., Beasley V.R. (1995) Alterations in microtubules, intermediate filaments, and  
684 microfilaments induced by microcystin-LR in cultured cells. *Toxicologic Pathology*,  
685 **23**, 326-337.
- 686 Wittmann T., Bokoch G.M., Waterman-Storer C.M. (2003) Regulation of leading edge  
687 microtubule and actin dynamics downstream of Rac1. *Journal of Cell Biology*, **161**,  
688 845-851.

689 Yoon J.-T., Ahn H.-K., Pai H.-S. (2018) The subfamily II catalytic subunits of protein  
690 phosphatase 2A (PP2A) are involved in cortical microtubule organization. *Planta*,  
691 **248**, 1551-1567.

692 Zervou S.-K., Gkelis S., Kaloudis T., Hiskia A., Mazur-Marzec, H. (2020) New  
693 microginins from cyanobacteria of Greek freshwaters. *Chemosphere*, **248**,  
694 125961.

695

## 696 Tables

697 **Table 1.** Occurrence of various cell cycle stages in *O. sativa* root tips, either control  
698 or after treatment with microcystin-LR (MC-LR) or the *Microcystis flos-aquae* TAU-  
699 MAC 1510 extract for 30 min and 1 h. Data represent absolute cell counts  
700 (percentages in parentheses). Data exhibiting statistically significant difference  
701 compared to the control are noted with asterisks (chi-squared test,  $df = 3$ ,  $P < 0.001$ ).

|                             | Control (%) | MC-LR        |             | <i>Microcystis flos-aquae</i> 1510 |            |
|-----------------------------|-------------|--------------|-------------|------------------------------------|------------|
|                             |             | 30 min (%)   | 1 h (%)*    | 30 min (%)*                        | 1 h (%)*   |
| <b>Interphase</b>           | 1080 (91.6) | 1012 (90.68) | 978 (92.44) | 895 (89.5)                         | 914 (91.4) |
| <b>Preprophase/Prophase</b> | 44 (3.73)   | 53 (4.75)    | 44 (4.16)   | 79 (7.9)                           | 51 (5.1)   |
| <b>Metaphase/Anaphase</b>   | 12 (1.02)   | 8 (0.72)     | 7 (0.66)    | 12 (1.2)                           | 31 (3.1)   |
| <b>Cytokinesis</b>          | 43 (3.65)   | 43 (3.85)    | 29 (2.74)   | 14 (1.4)                           | 4 (0.4)    |

702

703

704

705

## 706 Figure Legends

707 **Figure 1. Maximum intensity projections of serial CLSM sections (A1, B1, C1,**  
708 **D1, E1, B3, C3-C5) and single cortical CLSM sections (A2, B2, C2, D2, E2) of *O.***  
709 ***sativa* protodermal cells in the root meristematic zone, after F-actin staining.**  
710 **treatment with purified MC-LR and/or.** In all images the root tip points towards the  
711 bottom of the page. Single cortical sections depict cells from the same root areas as  
712 the projections, at higher magnification. Control cells exhibit a well-organized network  
713 of abundant fine cortical and endoplasmic actin filaments (**A1**). The dominant  
714 orientation of cortical actin filaments is transverse (perpendicular to the root axis,  
715 **A2**). Cytokinetic cells with prominent F-actin phragmoplasts are noted by arrows  
716 (projections **A1-E1**). After treatment with MC-LR, cortical actin filaments appear  
717 disoriented at 30 min (indicative arrowheads in **B2**; cf. **A2**), tending to form bundles  
718 after 1 h (indicative arrowheads in **B2, C2, D2**). Ring-shaped F-actin conformations  
719 (actin-rings) are visible in affected cells after 30 min and 1 h of treatment  
720 (arrowheads in **B3** and **C3-C5**, enlargements of framed areas in **B1** and **C1**,  
721 respectively). After 24 h, F-actin fluorescence intensity is noticeably decreased (**E1**)  
722 and the cortical F-actin network barely visible (**E2**). Scale bars: 10  $\mu$ m.

723 **Figure 2. Maximum intensity projections of serial CLSM cortical sections (A1,**  
724 **B1, C1, D1) and single cortical CLSM sections (A2, B2, C2, D2) of *O. sativa***  
725 **protodermal cells in the root meristematic zone, after treatment with the *M.***  
726 ***flos-aquae* TAU-MAC 1510 extract and F-actin staining.** All figures are oriented  
727 with the root tip to the bottom of the page. Single cortical sections (**A2-D2**) depict  
728 cells from the same root areas as the projections (**A1-D1**), at higher magnification.  
729 After 30 min of treatment with the extract (**A1**), cortical actin filaments appear  
730 disoriented (**A2**; cf. **Fig. 1A2**), tending to form bundles after 1 h (indicative  
731 arrowheads in **B1, B2**). After 2 h, bundling increases (indicative arrowheads in **C1**,  
732 **C2**). After 24 h, the F-actin network has collapsed and cells devoid of actin filaments

733 (area marked with star in **D1**) can be observed, along with remnants of bundles  
734 (arrowhead in **D2**). Scale bars: 10  $\mu$ m.

735 **Figure 3. Maximum intensity projections of serial CLSM sections of *O. sativa***  
736 **epidermal cells in the root differentiation zone, after F-actin staining.** All figures  
737 are oriented with the root tip to the bottom of the page. In control cells, longitudinal  
738 subcortical F-actin bundles can be observed (**A**). Cells treated with MC-LR for 30 min  
739 exhibit disoriented subcortical F-actin bundles, converging at several cell sites  
740 (indicative arrowheads in **B**; cf. **A**). This effect is also detectable after 1 and 2 h  
741 (arrowheads in **C** and **D**, respectively). After 24 h, F-actin bundles have diminished  
742 and only remnants of F-actin bundles (arrowheads in **E**) can be observed. Scale  
743 bars: 10  $\mu$ m.

744 **Figure 4. Maximum intensity projections of serial CLSM sections of *O. sativa***  
745 **epidermal cells in the root differentiation zone, after treatment with the *M. flos-***  
746 ***aquae* TAU-MAC 1510 extract and F-actin staining.** All figures are oriented with  
747 the root tip to the bottom of the page, except for (**C2**, **D2**) with the root tip to the right.  
748 After treatment with the extract for 30 min, subcortical F-actin bundles appear to be  
749 disoriented (**A**; cf. **Fig. 3A**), tending to form aggregates at 1 h (**B**). After 2 h, actin  
750 filaments begin to diminish (**C1**) and F-actin rings can be observed (arrows in **C2**,  
751 enlargement of the framed area of **C1**). After 24 h, cells devoid of F-actin can be  
752 observed (**D1**), while F-actin rings (arrows in **D2** and **D3**, enlargements of framed  
753 areas of **D1**) are abundant in cells that still exhibit actin filaments. Scale bars: 10  $\mu$ m.

754 **Figure 5. Fluorescence intensity measurements of F-actin in *O. sativa* root**  
755 **cells.** Maximum intensity projections of serial CLSM sections of the meristematic and  
756 differentiation zones of roots treated with the *M. flos-aquae* TAU-MAC 1510 extract  
757 (maroon) or purified MC-LR (green) for various durations (30 min, 1, 2 and 24 h)  
758 were compared to similar images of control roots. Fluorescence intensity decreases

759 drastically in a time-dependent manner, especially after treatment with MC-LR.  
760 Temporary increases, where visible, could be attributed to F-actin bundling effects.  
761 Error bars indicate the standard error. All data shown exhibit statistically significant  
762 difference compared to control (ANOVA with Dunnett's test),  $P < 0.001$ .  $n = 30$ .

763 **Figure 6. Endoplasmic reticulum distribution in *O. sativa* root cells.** Various  
764 durations of treatment with the *M. flos-aquae* TAU-MAC 1510 extract are indicated  
765 on the images. **A-D.** Single CLSM central sections, after endoplasmic reticulum  
766 immunolabeling (green) and DNA staining with DAPI (pseudocoloration in red).  
767 Untreated cells (**A**) exhibit even endoplasmic reticulum distribution during interphase  
768 (cells at middle and right), while during metaphase endoplasmic reticulum engages  
769 the spindle (left). Treatment with the extract results in appearance of endoplasmic  
770 reticulum aggregates (arrows in **B-D**), even after only 30 min (**B**), the fluorescence  
771 intensity of which fades as treatment duration increases (**C, D**). Scale bars: 5  $\mu\text{m}$ . **E,**  
772 **F.** TEM micrographs depicting normal endoplasmic reticulum distribution in control  
773 cells (**E**) and a stack of endoplasmic reticulum cisternae (arrow in **F**) after 30 min of  
774 treatment. After longer treatment, endoplasmic reticulum cisternae could not be  
775 found by TEM. Scale bars: 0.2  $\mu\text{m}$ .

776 **Figure 7. TEM micrographs of Golgi dictyosome distribution in *O. sativa* root**  
777 **cells.** Dictyosomes are normally distributed and distanced in an untreated cell (**A**).  
778 After 30 min (**B**) and 1 h (**C**) of treatment with the *M. flos-aquae* TAU-MAC 1510  
779 extract, dictyosomes gather in clusters, displaying aggregates of vesicles (asterisks)  
780 entrapped between them. Scale bars: 0.2  $\mu\text{m}$  (**A, B**) and 0.5  $\mu\text{m}$  (**C**).

781

782

783

# Meristematic zone

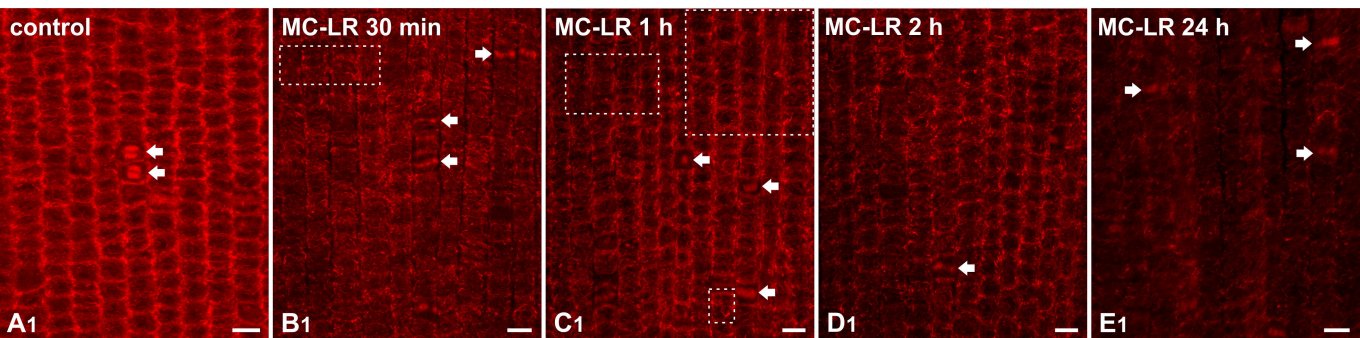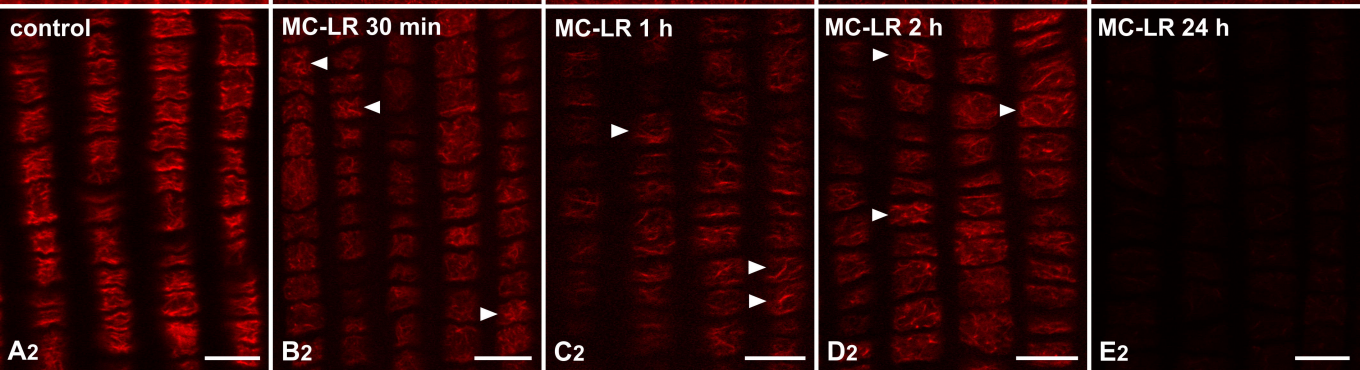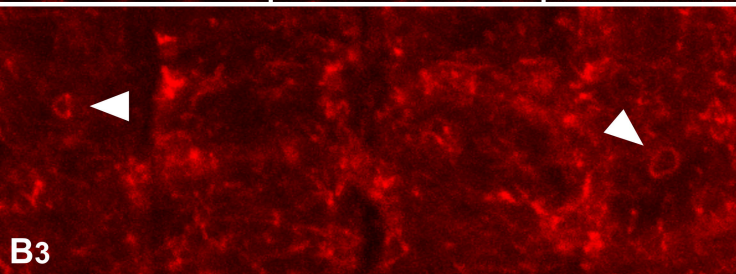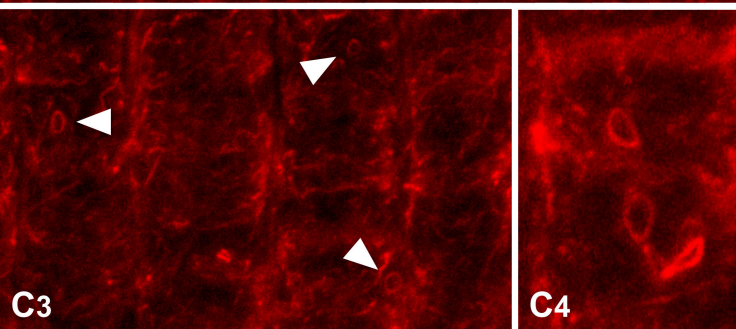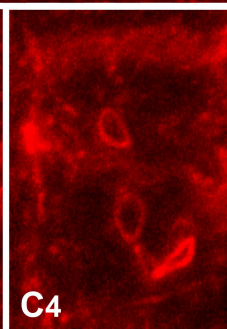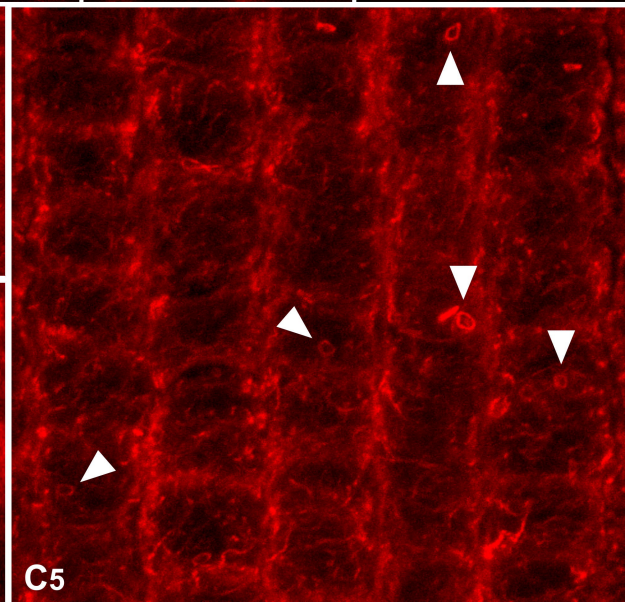

# Meristematic zone

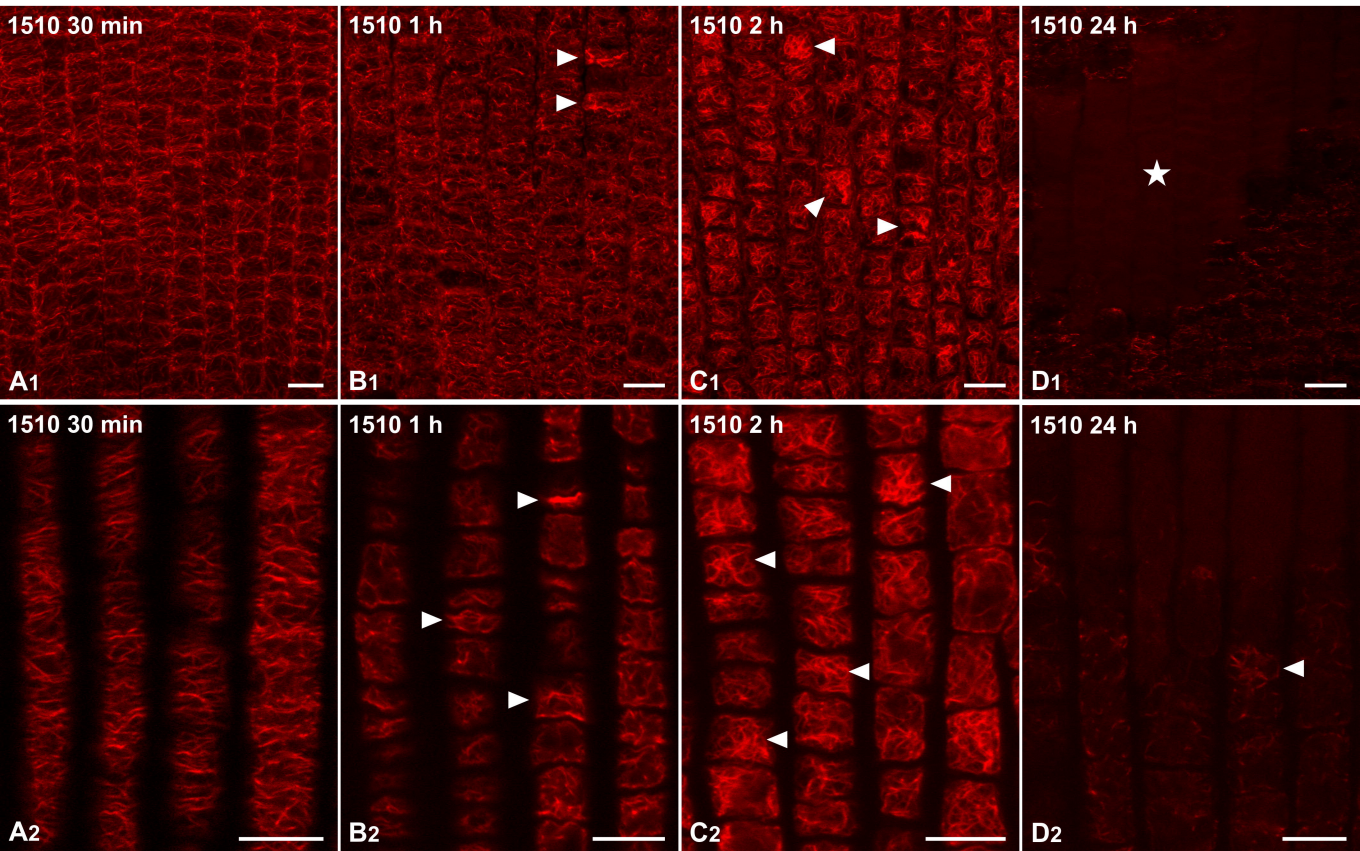

# Differentiation zone

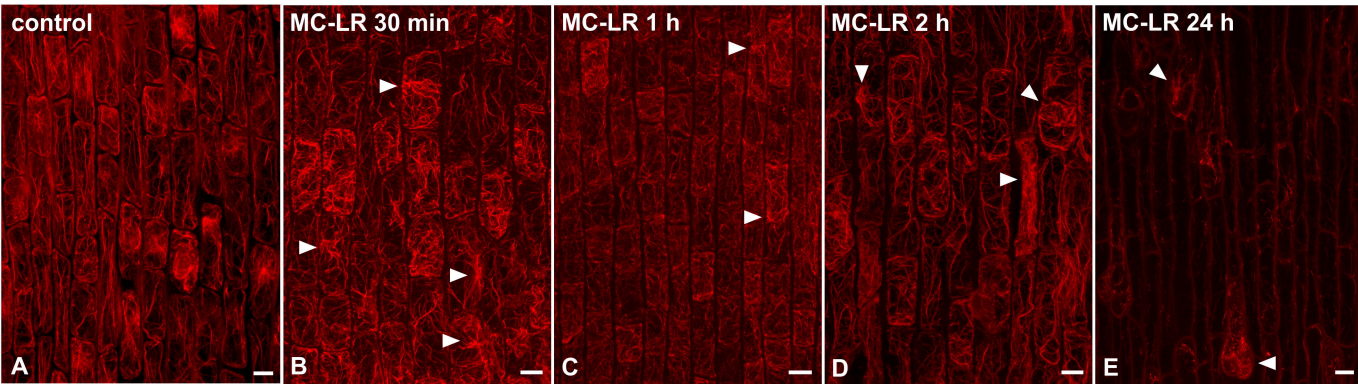



# Differentiation zone

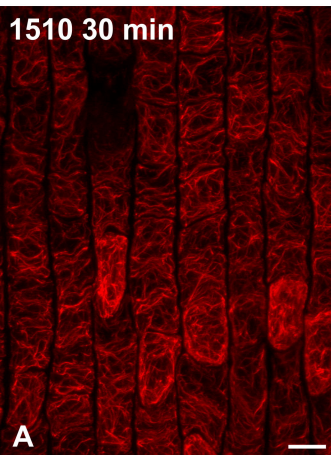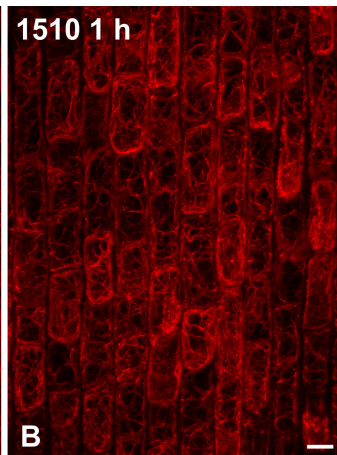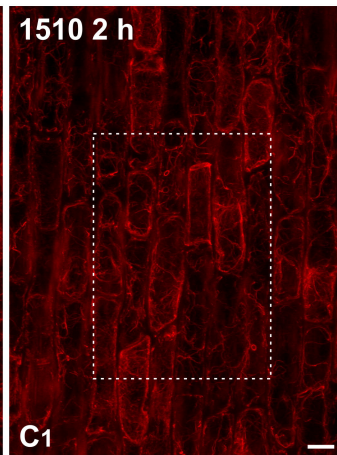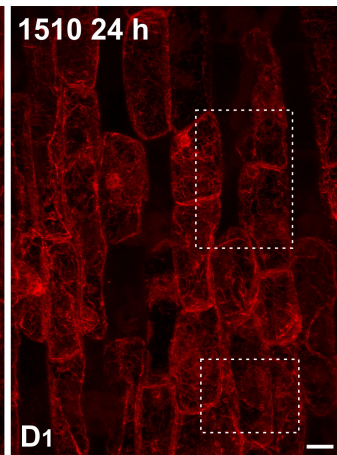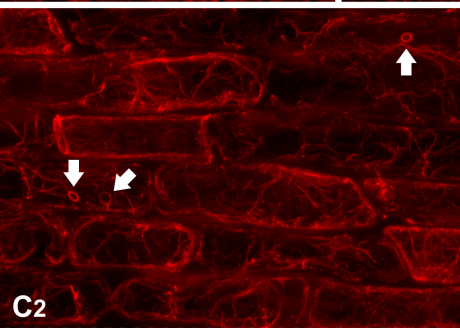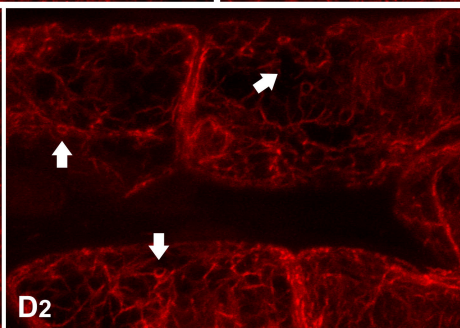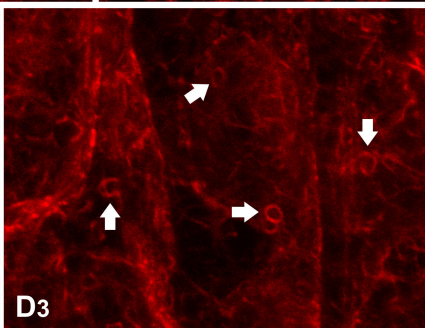

## Meristematic zone

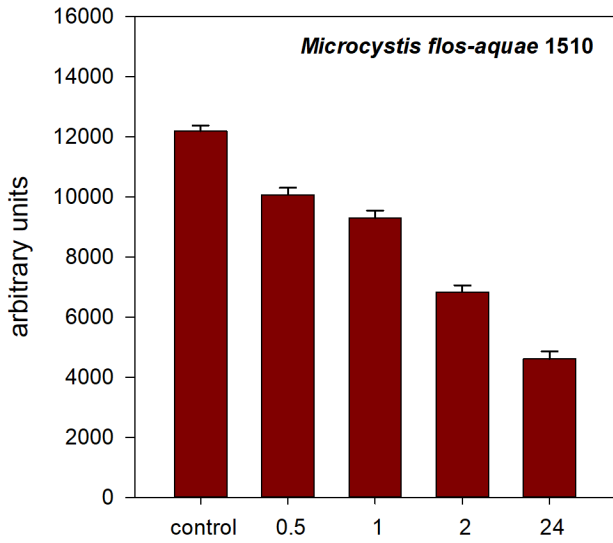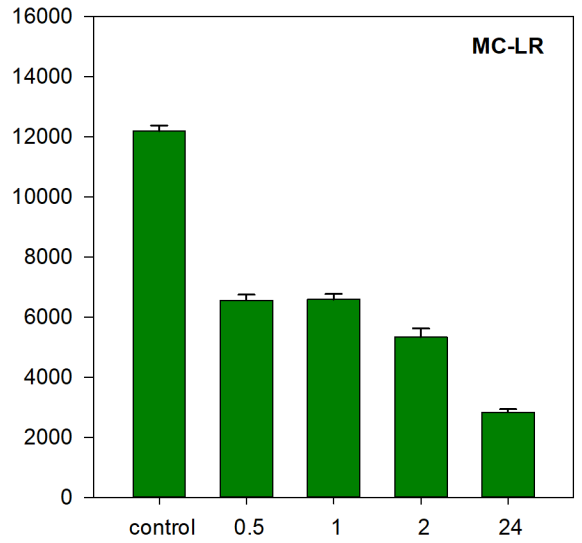

## Elongation zone

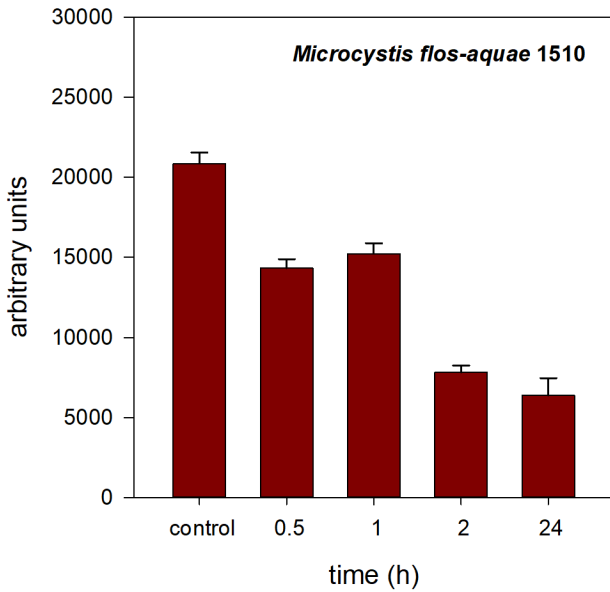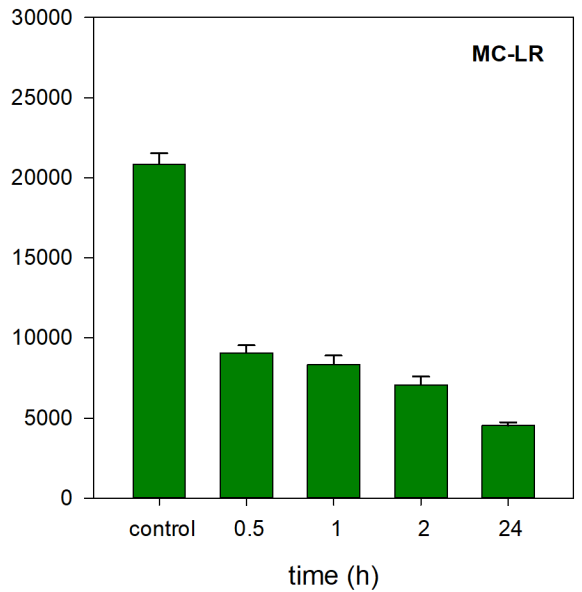

CLSM

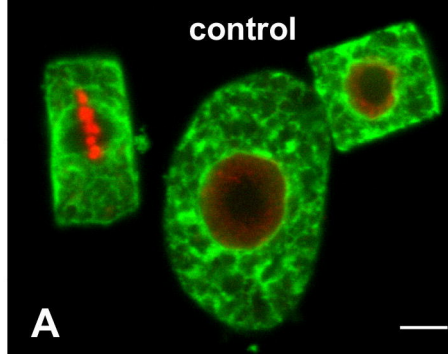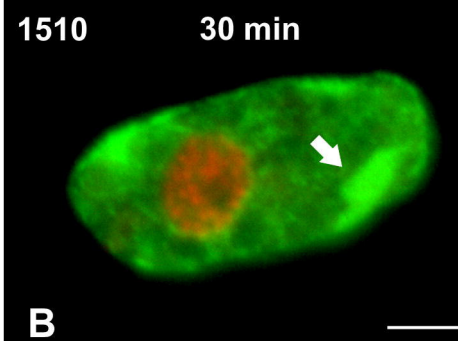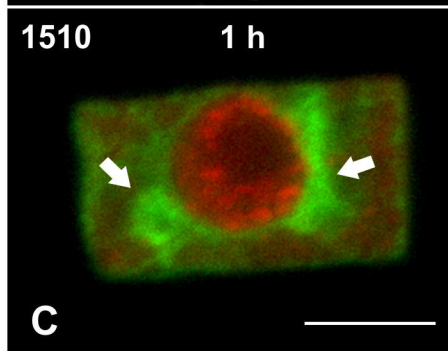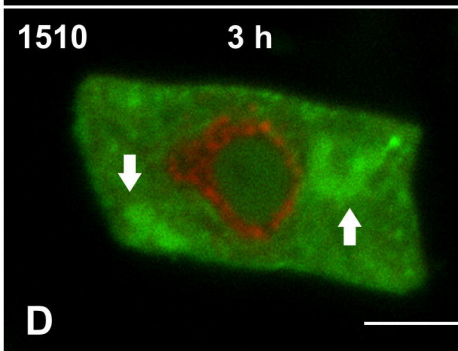

TEM

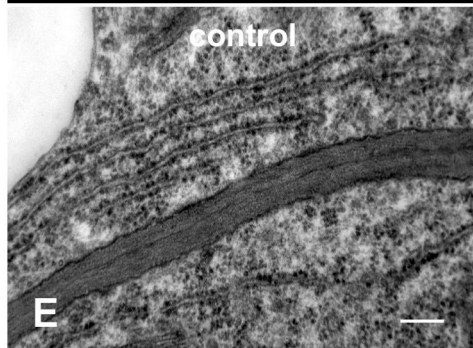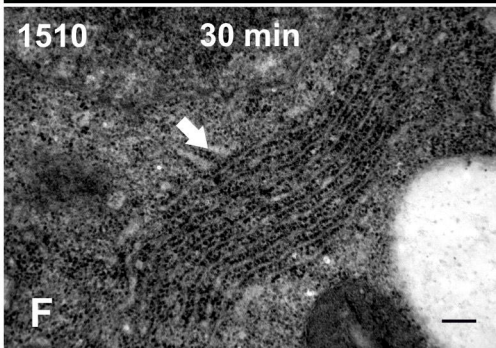

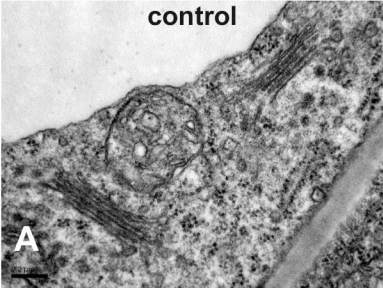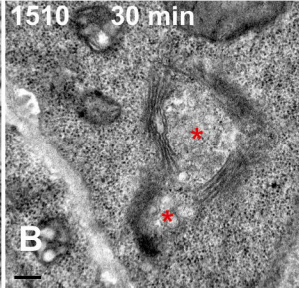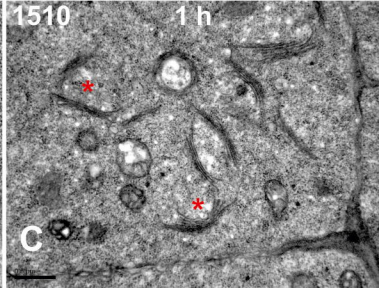

Source: https://www.biorxiv.org/content/10.1101/2020.02.17.952218v1.full.pdf
